# Supplementary material
Source: Springer Nature journal article supplement (https://www.springermedizin.de/resource/supplementary/12872_2008_220_MOESM2_ESM.pdf/9431270)

# ADRA1A Arg347Cys

Arg/Arg

Arg/Cys

Cys/Cys

Age (years)

< 45 years

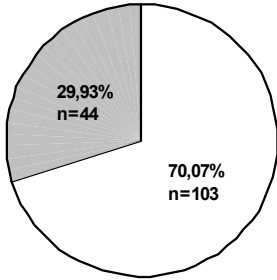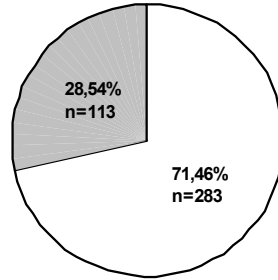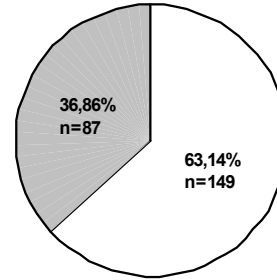

**Hypertension status**

□ Absent

■ Present

> 45 years

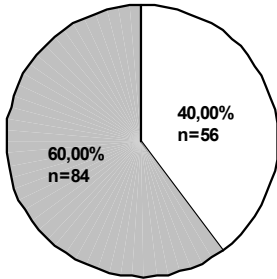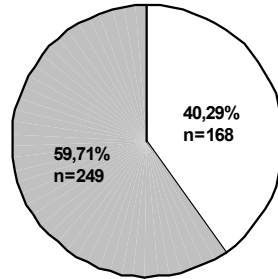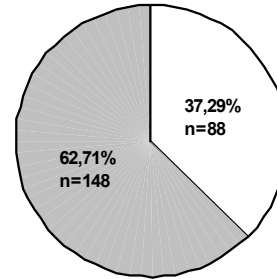

Supplement: MOESM2 [file 9431270]
